# Supplementary material for: Chronic Inflammation Modulates Opioid Receptor Gene Expression and Triggers Respiratory Burst in a Teleost Model
Source: MDPI journal article supplement (doi:10.3390/biology11050764), 2022-05-17
Supplement: s1 [file s1]

*Supplementary File*

# **Chronic inflammation modulates opioid receptor gene expression and triggers respiratory burst in a teleost model**

**Diogo Peixoto <sup>1,2,3</sup>, Marina Machado <sup>2</sup>, Rita Azeredo <sup>2</sup> and Benjamín Costas <sup>2\*</sup>**

<sup>1</sup> ICBAS - Instituto de Ciências Biomédicas Abel Salazar. Universidade do Porto. Porto, Portugal; dpeixoto@ciimar.up.pt (D.P.)

<sup>2</sup> CIIMAR - Centro Interdisciplinar de Investigação Marinha e Ambiental. Matosinhos, Portugal; mcasimiro@ciimar.up.pt (M.M.), mleme@ciimar.up.pt (R.A.) and bcostas@ciimar.up.pt (B.C.)

<sup>3</sup> Departamento de Biología, Facultad de Ciencias del Mar y Ambientales. Instituto Universitario de Investigación Marina (INMAR), CEIMAR-Universidad de Cádiz, Cádiz, Spain

\* Correspondence: mleme@ciimar.up.pt (R.A.) and bcostas@ciimar.up.pt (B.C.)

**Table S1** - Absolute values of total white, red and peritoneal cells, peripheral leucocytes (neutrophils, monocytes, lymphocytes and thrombocytes) and respiratory burst of European seabass after 24 hours, 7, 14 and 21 days after inflammation.

| Parameters                                                  | Treatment | Time post-injection |   |         |                |        |   |        |                 |         |   |        |                |         |   |         |                |
|-------------------------------------------------------------|-----------|---------------------|---|---------|----------------|--------|---|--------|-----------------|---------|---|--------|----------------|---------|---|---------|----------------|
|                                                             |           | 24 hours            |   |         |                | 7 days |   |        |                 | 14 days |   |        |                | 21 days |   |         |                |
| WBC (x10 <sup>4</sup> μL <sup>-1</sup> )                    | CTRL      | 4.33                | ± | 0.93    |                | 5.83   | ± | 1.55   |                 | 4.77    | ± | 1.45   |                | 9.95    | ± | 2.51    |                |
|                                                             | FIA       | 5.5                 | ± | 1.05    |                | 4.8    | ± | 0.71   |                 | 4.53    | ± | 1.43   |                | 10.25   | ± | 1.75    |                |
| RBC (x10 <sup>4</sup> μL <sup>-1</sup> )                    | CTRL      | 16.15               | ± | 4.27    |                | 13.35  | ± | 2.5    |                 | 15.13   | ± | 5.79   |                | 18.63   | ± | 6.31    |                |
|                                                             | FIA       | 14.53               | ± | 3.27    |                | 17.05  | ± | 2.62   |                 | 11.08   | ± | 4.49   |                | 17.53   | ± | 2.58    |                |
| Hematocrit (%)                                              | CTRL      | 26.33               | ± | 3.83    |                | 31.17  | ± | 2.48   |                 | 25.33   | ± | 3.67   |                | 25.2    | ± | 4.82    |                |
|                                                             | FIA       | 30                  | ± | 4.86    |                | 30.33  | ± | 2.81   |                 | 26.83   | ± | 1.72   |                | 28.6    | ± | 4.04    |                |
| Neutrophils (x10 <sup>4</sup> μL <sup>-1</sup> )            | CTRL      | 0.11                | ± | 0.04    | a <sup>#</sup> | 0.04   | ± | 0.01   | a <sup>#</sup>  | 0.07    | ± | 0.01   | a              | 0.27    | ± | 0.09    | b              |
|                                                             | FIA       | 0.25                | ± | 0.04    | b <sup>*</sup> | 0.2    | ± | 0.06   | ab <sup>*</sup> | 0.1     | ± | 0.04   | a              | 0.18    | ± | 0.05    | ab             |
| Monocytes (x10 <sup>4</sup> μL <sup>-1</sup> )              | CTRL      | 0.08                | ± | 0.05    | a              | 0.08   | ± | 0.01   | a <sup>#</sup>  | 0.11    | ± | 0.02   | ab             | 0.27    | ± | 0.09    | b <sup>#</sup> |
|                                                             | FIA       | 0.16                | ± | 0.08    | a              | 0.33   | ± | 0.1    | b <sup>*</sup>  | 0.6     | ± | 0.09   | ab             | 0.57    | ± | 0.2     | c <sup>*</sup> |
| Lymphocytes (x10 <sup>4</sup> μL <sup>-1</sup> )            | CTRL      | 1.22                | ± | 0.16    | a <sup>#</sup> | 1.85   | ± | 0.24   | a               | 1.45    | ± | 0.36   | a              | 1.69    | ± | 0.24    | b              |
|                                                             | FIA       | 1.96                | ± | 0.12    | a <sup>*</sup> | 1.54   | ± | 0.2    | a               | 1.69    | ± | 0.24   | a              | 4.29    | ± | 0.58    | b              |
| Thrombocytes (x10 <sup>4</sup> μL <sup>-1</sup> )           | CTRL      | 2.95                | ± | 0.51    |                | 3.54   | ± | 0.69   |                 | 3.59    | ± | 0.76   |                | 5.33    | ± | 0.76    |                |
|                                                             | FIA       | 3.19                | ± | 0.29    |                | 2.61   | ± | 0.38   |                 | 2.6     | ± | 0.91   |                | 4.88    | ± | 0.27    |                |
| Total peritoneal cells (x10 <sup>4</sup> μL <sup>-1</sup> ) | CTRL      | 5.83                | ± | 3.44    |                | 9.88   | ± | 7.31   |                 | 6.47    | ± | 6.66   |                | 7       | ± | 5.97    |                |
|                                                             | FIA       | 11.7                | ± | 3.58    | a              | 42.15  | ± | 23.15  | b <sup>*</sup>  | 46.92   | ± | 9.8    | b <sup>*</sup> | 35.23   | ± | 8.73    | b <sup>*</sup> |
| Respiratory burst (nmol O <sub>2</sub> )                    | CTRL      | 1277.56             | ± | 1121.38 |                | 375.28 | ± | 172.56 |                 | 486.33  | ± | 388.98 |                | 743.67  | ± | 903.51  | #              |
|                                                             | FIA       | 2721.22             | ± | 1313.3  | b              | 462.56 | ± | 175.24 | a               | 800.39  | ± | 802.77 | a              | 4134.39 | ± | 1294.93 | b <sup>*</sup> |

Two-way ANOVA

| Parameters                                                  | Time  | Treatment | Time <i>vs</i><br>Treatment | Treatment |     | Time     |        |         |         |
|-------------------------------------------------------------|-------|-----------|-----------------------------|-----------|-----|----------|--------|---------|---------|
|                                                             |       |           |                             | CTRL      | FIA | 24 hours | 7 days | 14 days | 21 days |
| WBC (x10 <sup>4</sup> µL <sup>-1</sup> )                    | <0.01 | ns        | ns                          | -         | -   | a        | a      | a       | b       |
| RBC (x10 <sup>4</sup> µL <sup>-1</sup> )                    | ns    | ns        | ns                          | -         | -   | -        | -      | -       | -       |
| Hematocrit (%)                                              | <0.01 | ns        | ns                          | -         | -   | ab       | b      | a       | ab      |
| Neutrophils (x10 <sup>4</sup> µL <sup>-1</sup> )            | <0.01 | <0.01     | <0.01                       | *         | #   | a        | ab     | b       | c       |
| Monocytes (x10 <sup>4</sup> µL <sup>-1</sup> )              | <0.01 | <0.01     | 0.005                       | *         | #   | a        | b      | ab      | c       |
| Lymphocytes (x10 <sup>4</sup> µL <sup>-1</sup> )            | <0.01 | 0.003     | 0.002                       | *         | #   | a        | a      | a       | b       |
| Thrombocytes (x10 <sup>4</sup> µL <sup>-1</sup> )           | <0.01 | 0.015     | 0.137                       | #         | *   | a        | a      | a       | b       |
| Total peritoneal cells (x10 <sup>4</sup> µL <sup>-1</sup> ) | 0.008 | <0.01     | 0.018                       | *         | #   | a        | b      | b       | ab      |
| Respiratory burst (nmol O <sub>2</sub> )                    | <0.01 | <0.01     | 0.004                       | *         | #   | b        | a      | a       | b       |

Values are presented as means ± SD (n = 6). Different low case letters stand for statistically significant differences attributed to sampling time. Symbols stand for significant differences between treatments. (Two-way ANOVA; Tukey post-hoc test;  $p \leq 0.05$ ).

**Table S2** - Plasma innate immune response parameters of European seabass after 24 hours, 7, 14 and 21 days after inflammation.

| Parameters                      | Treatment | Time post-injection |   |        |        |   |        |         |   |        |         |   |        |
|---------------------------------|-----------|---------------------|---|--------|--------|---|--------|---------|---|--------|---------|---|--------|
|                                 |           | 24 hours            |   |        | 7 days |   |        | 14 days |   |        | 21 days |   |        |
| IgMp (OD 450 nm)                | CTRL      | 0.16                | ± | 0.111  | 0.132  | ± | 0.031  | 0.089   | ± | 0.028  | 0.219   | ± | 0.082  |
|                                 | FIA       | 0.161               | ± | 0.056  | 0.109  | ± | 0.027  | 0.084   | ± | 0.036  | 0.255   | ± | 0.099  |
| Inihibited trypsin (%)          | CTRL      | 81.193              | ± | 0.297  | 81.617 | ± | 0.992  | 83.682  | ± | 1.641  | 82.612  | ± | 2.78   |
|                                 | FIA       | 81.267              | ± | 0.323  | 82.282 | ± | 1.782  | 81.877  | ± | 1.442  | 82.115  | ± | 1.83   |
| Total protease (%)              | CTRL      | 7.755               | ± | 1.364  | 10.291 | ± | 0.808  | 9.08    | ± | 1.035  | 9.98    | ± | 0.92   |
|                                 | FIA       | 9.608               | ± | 1.771  | 9.831  | ± | 1.443  | 10.98   | ± | 1.959  | 11.217  | ± | 0.952  |
| Peroxidase (U perox)            | CTRL      | 38.693              | ± | 19.154 | 39.48  | ± | 20.309 | 60.283  | ± | 17.627 | 37.911  | ± | 21.77  |
|                                 | FIA       | 32.361              | ± | 9.087  | 54.827 | ± | 13.395 | 42.333  | ± | 18.419 | 31.633  | ± | 23.743 |
| Lysozyme (mg mL <sup>-1</sup> ) | CTRL      | 1.73                | ± | 1.213  | 4.328  | ± | 3.772  | 4.161   | ± | 1.356  | 2.713   | ± | 1.252  |
|                                 | FIA       | 2.372               | ± | 1.493  | 9.721  | ± | 3.949  | 5.008   | ± | 1.204  | 4.459   | ± | 1.772  |

**Table S2** - Continuation.

Two-way ANOVA

| Parameters                      | Time   | Treatment | Time <i>vs</i><br>Treatment | Treatment |     | Time     |        |         |         |
|---------------------------------|--------|-----------|-----------------------------|-----------|-----|----------|--------|---------|---------|
|                                 |        |           |                             | CTRL      | FIA | 24 hours | 7 days | 14 days | 21 days |
| IgMp (OD 450 nm)                | <0.001 | ns        | ns                          | -         | -   | ab       | a      | a       | b       |
| Inihibited trypsin (%)          | ns     | ns        | ns                          | -         | -   | -        | -      | -       | -       |
| Total protease (%)              | 0.003  | 0.006     | ns                          | *         | #   | a        | b      | ab      | b       |
| Peroxidase (U perox)            | ns     | ns        | ns                          | -         | -   | -        | -      | -       | -       |
| Lysozyme (mg mL <sup>-1</sup> ) | <0.001 | 0.003     | ns                          | *         | #   | a        | b      | ab      | a       |

Values are presented as means  $\pm$  SD (n = 6). Different low case letters stand for statistically significant differences attributed to sampling time. Symbols stand for significant differences between treatments. (Two-way ANOVA; Tukey post-hoc test;  $p \leq 0.05$ ).

**Table S3** - Quantitative expression of immune-related gene and opioids receptors of head-kidney of European seabass after 24 hours, 7, 14 and 21 days after inflammation.

| Parameters               | Treatment | Time post-injection |   |        |   |        |   |       |   |         |   |       |    |         |   |       |    |
|--------------------------|-----------|---------------------|---|--------|---|--------|---|-------|---|---------|---|-------|----|---------|---|-------|----|
|                          |           | 24 hours            |   |        |   | 7 days |   |       |   | 14 days |   |       |    | 21 days |   |       |    |
|                          |           |                     |   |        |   |        |   |       |   |         |   |       |    |         |   |       |    |
| <i>tgfb</i>              | CTRL      | 1.466               | ± | 0.433  |   | 0.729  | ± | 0.426 |   | 1.175   | ± | 0.6   |    | 1.083   | ± | 0.382 |    |
|                          | FIA       | 1.335               | ± | 0.415  |   | 0.881  | ± | 0.304 |   | 1.886   | ± | 1.058 |    | 1.035   | ± | 0.494 |    |
| <i>cxcr4</i>             | CTRL      | 1.093               | ± | 0.591  |   | 1.046  | ± | 0.339 |   | 1.82    | ± | 1.357 |    | 1.148   | ± | 0.240 |    |
|                          | FIA       | 0.65                | ± | 0.222  |   | 1.272  | ± | 0.382 |   | 2.389   | ± | 0.353 |    | 1.788   | ± | 0.548 |    |
| <i>il1b</i>              | CTRL      | 3.002               | ± | 2.952  |   | 0.26   | ± | 0.211 |   | 1.007   | ± | 0.429 |    | 1.43    | ± | 0.618 |    |
|                          | FIA       | 3.164               | ± | 2.214  |   | 0.931  | ± | 0.938 |   | 2.38    | ± | 1.417 |    | 1.399   | ± | 0.606 |    |
| <i>mmp9</i> <sup>1</sup> | CTRL      | 2.501               | ± | 0.85   | b | 0.528  | ± | 0.31  | a | 0.928   | ± | 0.43  | a  | 1.439   | ± | 0.69  | ab |
|                          | FIA       | 2.39                | ± | 0.67   | b | 0.852  | ± | 0.5   | a | 2.431   | ± | 3.07  | ab | 0.794   | ± | 0.34  | a  |
| <i>casp1</i>             | CTRL      | 5.321               | ± | 6.749  |   | 0.809  | ± | 0.456 |   | 1.754   | ± | 1.697 |    | 0.728   | ± | 0.610 |    |
|                          | FIA       | 6.72                | ± | 4.398  |   | 1.287  | ± | 1.123 |   | 1.574   | ± | 0.923 |    | 1.349   | ± | 1.061 |    |
| <i>il10</i>              | CTRL      | 6.336               | ± | 5.885  |   | 0.242  | ± | 0.163 |   | 1.075   | ± | 0.967 |    | 0.244   | ± | 0.159 |    |
|                          | FIA       | 3.963               | ± | 1.977  |   | 0.453  | ± | 0.424 |   | 0.549   | ± | 0.436 |    | 0.623   | ± | 0.597 |    |
| <i>il34</i>              | CTRL      | 0.752               | ± | 0.239  |   | 1.004  | ± | 0.957 |   | 1.333   | ± | 0.522 |    | 0.954   | ± | 0.41  |    |
|                          | FIA       | 0.936               | ± | 1.045  |   | 1.854  | ± | 1.454 |   | 3.762   | ± | 2.65  |    | 1.667   | ± | 0.569 |    |
| <i>hep</i>               | CTRL      | 19.787              | ± | 28.925 |   | 0.589  | ± | 0.663 |   | 4.242   | ± | 7.094 |    | 0.630   | ± | 0.802 |    |
|                          | FIA       | 20.095              | ± | 17.693 |   | 1.742  | ± | 1.846 |   | 3.723   | ± | 5.56  |    | 2.917   | ± | 3.775 |    |
| <i>ifn-γ</i>             | CTRL      | 14.162              | ± | 16.663 |   | 0.745  | ± | 0.963 |   | 3.398   | ± | 4.858 |    | 0.644   | ± | 0.82  |    |
|                          | FIA       | 10.396              | ± | 6.699  |   | 1.163  | ± | 1.223 |   | 2.688   | ± | 4.029 |    | 1.082   | ± | 1.173 |    |
| IgM <sup>1</sup>         | CTRL      | 0.937               | ± | 0.479  |   | 0.684  | ± | 0.611 |   | 0.858   | ± | 0.36  |    | 1.524   | ± | 0.064 |    |

|  |     |      |   |       |       |   |       |       |   |       |       |   |       |
|--|-----|------|---|-------|-------|---|-------|-------|---|-------|-------|---|-------|
|  | FIA | 3.71 | ± | 2.796 | 1.142 | ± | 1.167 | 3.052 | ± | 3.006 | 1.316 | ± | 0.276 |
|--|-----|------|---|-------|-------|---|-------|-------|---|-------|-------|---|-------|

Table S3 - Continuation.

|            |      |       |   |       |       |   |       |       |   |       |       |   |       |
|------------|------|-------|---|-------|-------|---|-------|-------|---|-------|-------|---|-------|
| <i>ptx</i> | CTRL | 1.604 | ± | 0.573 | 1.029 | ± | 1.012 | 1.083 | ± | 0.695 | 1.546 | ± | 0.921 |
|            | FIA  | 1.397 | ± | 0.203 | 1.092 | ± | 0.463 | 1.073 | ± | 0.705 | 1.376 | ± | 0.469 |

Opioids receptors

|                            |              |      |        |   |        |       |   |       |       |   |       |       |   |       |
|----------------------------|--------------|------|--------|---|--------|-------|---|-------|-------|---|-------|-------|---|-------|
| Normalized mRNA expression | <i>nopr</i>  | CTRL | 3.551  | ± | 3.116  | 0.291 | ± | 0.313 | 2.001 | ± | 2.01  | 0.539 | ± | 0.309 |
|                            |              | FIA  | 6.219  | ± | 4.819  | 0.315 | ± | 0.176 | 6.1   | ± | 7.654 | 0.301 | ± | 0.43  |
|                            | <i>muor</i>  | CTRL | 11.026 | ± | 9.459  | 0.583 | ± | 0.741 | 1.452 | ± | 1.575 | 1.625 | ± | 1.557 |
|                            |              | FIA  | 6.258  | ± | 4.457  | 1.837 | ± | 2.033 | 4.666 | ± | 5.547 | 2.462 | ± | 1.354 |
|                            | <i>kor1</i>  | CTRL | 11.781 | ± | 9.359  | 0.506 | ± | 0.414 | 1.323 | ± | 1.819 | 0.388 | ± | 0.477 |
|                            |              | FIA  | 7.621  | ± | 4.403  | 1.275 | ± | 1.239 | 1.296 | ± | 1.4   | 1.244 | ± | 1.005 |
|                            | <i>dor2</i>  | CTRL | 9.674  | ± | 10.706 | 0.708 | ± | 0.79  | 2.98  | ± | 4.781 | 0.576 | ± | 0.596 |
|                            |              | FIA  | 12.729 | ± | 10.237 | 1.821 | ± | 2.068 | 1.283 | ± | 2.062 | 1.448 | ± | 1.424 |
|                            | <i>ogfr1</i> | CTRL | 5.910  | ± | 8.871  | 0.555 | ± | 0.769 | 1.706 | ± | 1.669 | 0.853 | ± | 0.423 |
|                            |              | FIA  | 5.839  | ± | 5.666  | 1.067 | ± | 1.191 | 1.4   | ± | 2.012 | 0.864 | ± | 0.779 |

<sup>1</sup> non-parametric tests with Kruskal-Wallis pairwise comparisons

Table S3 - Continuation.

## Two-way ANOVA

| Parameters       | Time   | Treatment | Time vs<br>Treatment | Treatment |     | Time     |        |         |         |
|------------------|--------|-----------|----------------------|-----------|-----|----------|--------|---------|---------|
|                  |        |           |                      | CTRL      | FIA | 24 hours | 7 days | 14 days | 21 days |
| <i>tgfb</i>      | 0.006  | ns        | ns                   | -         | -   | b        | a      | b       | a       |
| <i>cxcr4</i>     | 0.002  | ns        | ns                   | -         | -   | a        | a      | b       | b       |
| <i>il1b</i>      | <0.001 | 0.05      | ns                   | #         | *   | b        | a      | b       | b       |
| <i>casp1</i>     | 0.036  | 0.023     | ns                   | #         | *   | b        | a      | a       | a       |
| <i>il10</i>      | <0.001 | ns        | ns                   | -         | -   | a        | b      | b       | b       |
| <i>il34</i>      | 0.036  | ns        | ns                   | -         | -   | a        | ab     | b       | ab      |
| <i>hep</i>       | 0.02   | ns        | ns                   | -         | -   | b        | a      | ab      | ab      |
| <i>ifn-y</i>     | ns     | ns        | ns                   | -         | -   | -        | -      | -       | -       |
| <i>ptx</i>       | ns     | ns        | ns                   | -         | -   | -        | -      | -       | -       |
| Opioid receptors |        |           |                      |           |     |          |        |         |         |
| <i>nopr</i>      | <0.001 | ns        | ns                   | -         | -   | b        | a      | b       | a       |
| <i>muor</i>      | 0.002  | ns        | ns                   | -         | -   | b        | a      | a       | ab      |
| <i>kor1</i>      | <0.001 | ns        | ns                   | -         | -   | b        | a      | a       | a       |



|              |       |    |    |   |   |   |    |    |   |
|--------------|-------|----|----|---|---|---|----|----|---|
| <i>dor2</i>  | 0.019 | ns | ns | - | - | b | ab | ab | a |
| <i>ogfr1</i> | ns    | ns | ns | - | - | - | -  | -  | - |

Values are presented as means  $\pm$  SD (n = 6). Different low case letters stand for statistically significant differences attributed to sampling time. Symbols stand for significant differences between treatments. (Two-way ANOVA; Tukey post-hoc test;  $p \leq 0.05$ ).

---

**Table S4 – Principal Component Analysis (PCA) eigenvalues.**

|                        | <b>F1</b> | <b>F2</b> | <b>F3</b> | <b>F4</b> | <b>F5</b> | <b>F6</b> | <b>F7</b> |
|------------------------|-----------|-----------|-----------|-----------|-----------|-----------|-----------|
| <b>Eigenvalue</b>      | 10.316    | 4.064     | 2.400     | 1.691     | 1.241     | 0.885     | 0.403     |
| <b>Variability (%)</b> | 49.126    | 19.352    | 11.426    | 8.054     | 5.910     | 4.215     | 1.917     |
| <b>Cumulative %</b>    | 49.126    | 68.478    | 79.904    | 87.958    | 93.868    | 98.083    | 100.000   |

**Table S5 - Principal Component Analysis (PCA) eigenvectors.**

|                      | <b>F1</b> | <b>F2</b> | <b>F3</b> | <b>F4</b> | <b>F5</b> |
|----------------------|-----------|-----------|-----------|-----------|-----------|
| <b>Plasma IgM</b>    | 0.002     | -0.041    | -0.542    | -0.392    | 0.129     |
| <b>Anti-protease</b> | 0.016     | 0.122     | -0.241    | 0.556     | 0.435     |
| <b>Protease</b>      | -0.201    | 0.294     | -0.171    | 0.086     | 0.014     |
| <b>Peroxidase</b>    | -0.029    | -0.223    | 0.441     | -0.171    | 0.373     |
| <b>Lysozyme</b>      | -0.157    | 0.030     | 0.331     | -0.146    | 0.464     |
| <b>Igs</b>           | -0.168    | -0.347    | -0.073    | 0.131     | -0.324    |
| <i>tgfb</i>          | 0.229     | 0.288     | 0.146     | -0.012    | -0.206    |
| <i>cxcr4</i>         | -0.140    | 0.383     | 0.213     | -0.033    | -0.032    |
| <i>il1b</i>          | 0.253     | 0.272     | -0.033    | -0.121    | 0.063     |
| <i>mmp9</i>          | 0.287     | 0.070     | -0.017    | -0.118    | -0.149    |
| <i>casp1</i>         | 0.276     | -0.055    | 0.046     | 0.182     | 0.027     |
| <i>il10</i>          | 0.291     | -0.114    | 0.092     | 0.009     | -0.056    |
| <i>igm</i>           | 0.174     | 0.331     | -0.212    | 0.096     | 0.063     |
| <i>ifn-y</i>         | 0.280     | -0.140    | 0.055     | 0.216     | 0.061     |
| <i>il34</i>          | -0.113    | 0.406     | 0.267     | -0.015    | 0.038     |
| <i>ptx</i>           | 0.230     | 0.067     | -0.211    | -0.398    | 0.211     |
| <i>nopr</i>          | 0.253     | 0.105     | 0.167     | 0.262     | -0.245    |
| <i>muor</i>          | 0.277     | 0.112     | 0.081     | -0.260    | -0.073    |

|              |       |        |        |        |        |
|--------------|-------|--------|--------|--------|--------|
| <i>kor1</i>  | 0.267 | -0.119 | 0.165  | -0.102 | -0.079 |
| <i>dor2</i>  | 0.252 | -0.255 | 0.017  | 0.019  | 0.180  |
| <i>ogfr1</i> | 0.276 | -0.020 | -0.071 | 0.196  | 0.322  |

---
